# Supplementary material for: TiCl4 catalyzed tandem construction of C–C and C–O bonds: a simple and one-pot atom-economical stereoselective synthesis of spiro-oxindoles
Source: Royal Society of Chemistry journal article supplement (doi:10.1039/b500224a), 2005-01-01
Supplement: b500224a.pdf [file b500224a.pdf]

## Electronic Supplementary Information

### TiCl<sub>4</sub> Catalyzed Tandem Construction of C-C and C-O Bonds: a Simple and One-Pot Atom-Economical Stereoselective Synthesis of Spiro-Oxindoles

Deevi Basavaiah,\* Jamjanam Srivardhana Rao, Raju Jannapu Reddy and Anumolu Jaganmohan Rao

*School of Chemistry, University of Hyderabad, Hyderabad-500 046, India*

E-mail: [dbsc@uohyd.ernet.in](mailto:dbsc@uohyd.ernet.in)

### Contents

|                                     |      |
|-------------------------------------|------|
| General Remarks                     | 2    |
| General procedure                   | 2    |
| Spectral data for all products      | 2-10 |
| ORTEP diagram of compound <b>3</b>  | 3    |
| ORTEP diagram of compound <b>11</b> | 8    |
| ORTEP diagram of compound <b>13</b> | 9    |

## Experimental Section:

**General Remarks:** Melting points were recorded on a Superfit (India) capillary melting point apparatus and are uncorrected. IR spectra were recorded on a JASCO-FT-IR model 5300 spectrometer using solid samples as KBr plates.  $^1\text{H}$  NMR (200 MHz / 400 MHz) and  $^{13}\text{C}$  NMR (50 MHz / 100 MHz) spectra were recorded in deuteriochloroform ( $\text{CDCl}_3$ ) on a Bruker-AC-200/Bruker-AVANCE-400 spectrometer using tetramethylsilane (TMS,  $\delta = 0$ ) as an internal standard. Elemental analyses were recorded on a Thermo Finnigan Flash EA 1112 analyzer. Mass spectra were recorded on either VG7070H mass spectrometer using EI technique or Shimadzu-LCMS-2010 A mass spectrometer. The X-ray diffraction measurements were carried out at 298 K on an automated Enraf-Nonious MACH 3 diffractometer using graphite monochromated,  $\text{Mo-K}\alpha$  ( $\lambda = 0.71073 \text{ \AA}$ ) radiation with CAD4 software or the X-ray intensity data were measured at 298 K on a Bruker SMART APEX CCD area detector system equipped with a graphite monochromator and a  $\text{Mo-K}\alpha$  fine-focus sealed tube ( $\lambda = 0.71073 \text{ \AA}$ ). 2-Acetyl-6-methyl-2,3-dihydro-4*H*-pyran (**2**) was prepared according to the literature procedure (K. Alder, H. Offermanns, E. Ruden, *Chem. Ber.*, 1941, **74B**, 905).

### General procedure:

**[1*S*,5*S*,7(3')*S*/1*R*,5*R*,7(3')*R*]-[1-Acetyl-5-methyl-6,8-dioxabicyclo(3.2.1)octane]-7-spiro-3'-(indolin-2'-one) (**3**):**

To a stirred solution of isatin (0.147 g, 1 mmol) in acetonitrile (5 mL) were successively added 2-acetyl-6-methyl-2,3-dihydro-4*H*-pyran (**2**) (0.28 g, 2 mmol) and  $\text{TiCl}_4$  (0.1 mL, 2 M solution in  $\text{CH}_2\text{Cl}_2$ , 0.2 mmol) at room temperature. After stirring at room temperature for 6 h, water was added to the reaction mixture and extracted with ethyl acetate (2 X 10 mL). The combined organic layer was dried over anhyd.  $\text{Na}_2\text{SO}_4$  and concentrated. The crude product thus obtained was purified by column chromatography (silica gel, 10% ethyl acetate in hexanes) to afford the desired compound **3** (0.212 g, 74 %) as a colorless solid.

m.p. : 163-165 °C

IR (KBr) :  $\nu$  3200-2800 (multiple bands), 1720, 1620  $\text{cm}^{-1}$ .

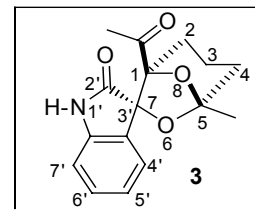

$^1\text{H}$  NMR (400 MHz,  $\text{CDCl}_3$ ) :  $\delta$  1.65-2.00 (m, 7H), 2.04 (s, 3H), 2.19-2.29 (m, 1H), 3.05-3.22 (m, 1H), 6.77 (d, 1H,  $J = 8.0$  Hz), 6.96-7.04 (m, 1H), 7.19-7.25 (m, 1H), 7.43 (d, 1H,  $J = 7.6$  Hz), 7.94 (b, 1H).

$^{13}\text{C}$  NMR (50 MHz,  $\text{CDCl}_3$ ) :  $\delta$  17.50, 25.48, 26.08, 27.42, 33.19, 83.67, 94.24, 110.18, 110.67, 122.70, 124.74, 129.35, 130.22, 140.33, 174.22, 205.83.

EIMS ( $m/z$ ) : 287 ( $\text{M}^+$ ).

Analysis calcd for  $\text{C}_{16}\text{H}_{17}\text{NO}_4$  : C, 66.89; H, 5.96; N, 4.87.

Found : C, 66.72; H, 5.98; N, 4.87.

**Crystal data** for **3**: empirical formula,  $\text{C}_{16}\text{H}_{17}\text{NO}_4$ ; formula weight, 287.31; crystal color, habit: colorless, rectangular; crystal dimensions, 0.52 X 0.48 X 0.42 mm; crystal system, triclinic; lattice type, primitive; lattice parameters,  $a = 7.508(17)$  Å,  $b = 8.223(7)$  Å,  $c = 12.453(8)$  Å;  $\alpha = 77.46(6)$ ;  $\beta = 83.05(10)$ ;  $\gamma = 74.89(10)$ ;  $V = 722.8(18)$  Å<sup>3</sup>; space group, P-1; (No: 2);  $Z = 2$ ;  $D_{\text{calcd}} = 1.320$  g /  $\text{cm}^3$ ;  $F_{000} = 304$ ;  $\lambda(\text{Mo-K}\alpha) = 0.71073$  Å;  $R(I \geq 2\sigma_1) = 0.0665$ ,  $wR^2 = 0.1793$ . Detailed X-ray crystallographic data is available from the Cambridge Crystallographic Data Centre, 12 Union Road, Cambridge CB2 1EZ, UK (for compound **3** CCDC # 248071).

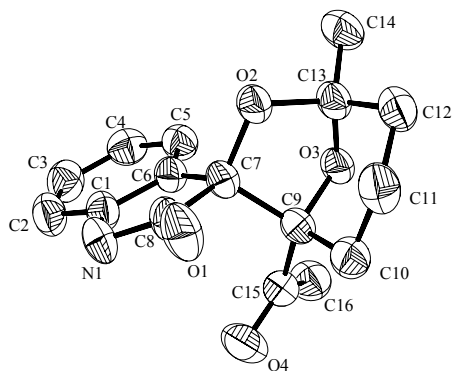

Fig.1. ORTEP diagram of compound **3**  
(Hydrogen atoms were omitted for clarity)

**[1*S*,5*S*,7(3')*S*/1*R*,5*R*,7(3')*R*]-[1-Acetyl-5-methyl-6,8-dioxabicyclo(3.2.1)octane]-7-spiro-3'-(1'-methylindolin-2'-one) (4):**

Yield : 64 %

m.p. : 148-150 °C

IR (KBr) :  $\nu$  1718, 1707, 1608  $\text{cm}^{-1}$ .

$^1\text{H}$  NMR (400 MHz,  $\text{CDCl}_3$ ) :  $\delta$  1.62-2.00 (m, 7H), 2.01 (s, 3H), 2.18-2.30 (m, 1H), 3.08-3.40 (m, 4H), 6.75 (d, 1H,  $J = 7.6$  Hz), 6.96-7.11 (m, 1H), 7.24-7.40 (m, 1H), 7.44 (d, 1H,  $J = 7.6$  Hz).

$^{13}\text{C}$  NMR (50 MHz,  $\text{CDCl}_3$ ) :  $\delta$  17.43, 25.40, 26.00, 26.43, 27.37, 33.16, 83.34, 94.00, 108.16, 110.48, 122.67, 124.24, 128.88, 130.19, 143.08, 171.99, 205.66.

LCMS (m/z) : 302 (M+H) $^+$ .

Analysis calcd for  $\text{C}_{17}\text{H}_{19}\text{NO}_4$  : C, 67.76; H, 6.36; N, 4.65.

Found : C, 67.99; H, 6.35; N, 4.61.

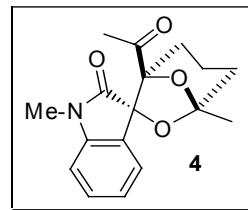

**[1*S*,5*S*,7(3')*S*/1*R*,5*R*,7(3')*R*]-[1-Acetyl-5-methyl-6,8-dioxabicyclo(3.2.1)octane]-7-spiro-3'-(1'-ethylindolin-2'-one) (5):**

Yield : 69 %

m.p. : 131-132 °C

IR (KBr) :  $\nu$  1720, 1709, 1610  $\text{cm}^{-1}$ .

$^1\text{H}$  NMR (200 MHz,  $\text{CDCl}_3$ ) :  $\delta$  1.27 (t, 3H,  $J = 6.8$  Hz), 1.56-1.94 (m, 7H), 1.98 (s, 3H), 2.12-2.29 (m, 1H), 3.06-3.30 (m, 1H), 3.64-3.88 (m, 2H), 6.75 (d, 1H,  $J = 7.8$  Hz), 6.94-7.03 (m, 1H), 7.20-7.31 (m, 1H), 7.43 (d, 1H,  $J = 8.0$  Hz).

$^{13}\text{C}$  NMR (50 MHz,  $\text{CDCl}_3$ ) :  $\delta$  12.16, 17.37, 25.35, 25.91, 27.29, 33.12, 34.86, 83.28, 94.00, 108.19, 110.42, 122.43, 124.45, 128.98, 130.07, 142.08, 171.50, 205.46.

EIMS (m/z) : 315 (M $^+$ ).

Analysis calcd for  $\text{C}_{18}\text{H}_{21}\text{NO}_4$  : C, 68.55; H, 6.71; N, 4.44.

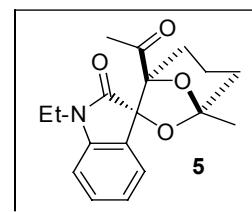

Found : C, 68.42; H, 6.74; N, 4.49.

**[1*S*,5*S*,7(3')*S*/1*R*,5*R*,7(3')*R*]-[1-Acetyl-5-methyl-6,8-dioxabicyclo(3.2.1)octane]-7-spiro-3'-(1'-benzylindolin-2'-one) (6):**

Yield : 70 %

m.p. : 141-143 °C

IR (KBr) :  $\nu$  1716, 1608  $\text{cm}^{-1}$ .

$^1\text{H}$  NMR (200 MHz,  $\text{CDCl}_3$ ) :  $\delta$  1.63-2.00 (m, 7H), 2.04 (s, 3H), 2.19-2.37 (m, 1H), 3.09-3.36 (m, 1H), 4.79 & 5.07 (ABq, 2H,  $J = 15.8$  Hz), 6.59 (d, 1H,  $J = 7.8$  Hz), 6.92-7.05 (m, 1H), 7.08-7.20 (m, 1H), 7.22-7.51 (m, 6H).

$^{13}\text{C}$  NMR (50 MHz,  $\text{CDCl}_3$ ) :  $\delta$  17.52, 25.50, 26.11, 27.56, 33.26, 44.23, 83.45, 94.24, 109.33, 110.64, 122.80, 124.32, 127.21, 127.57, 128.79, 129.10, 130.12, 135.48, 142.42, 172.35, 205.93.

LCMS (m/z) : 378 (M+H) $^+$ .

Analysis calcd for  $\text{C}_{23}\text{H}_{23}\text{NO}_4$  : C, 73.19; H, 6.14; N, 3.71.

Found : C, 73.01; H, 6.19; N, 3.73.

**[1*S*,5*S*,7(3')*S*/1*R*,5*R*,7(3')*R*]-[1-Acetyl-5-methyl-6,8-dioxabicyclo(3.2.1)octane]-7-spiro-3'-(1'-phenylindolin-2'-one) (7):**

Yield : 56 %

m.p. : 125-126 °C

IR (KBr) :  $\nu$  1728, 1707, 1610  $\text{cm}^{-1}$ .

$^1\text{H}$  NMR (200 MHz,  $\text{CDCl}_3$ ) :  $\delta$  1.62-2.00 (m, 7H), 2.04 (s, 3H), 2.15-2.30 (m, 1H), 3.06-3.32 (m, 1H), 6.64 (d, 1H,  $J = 7.8$  Hz), 6.94-7.08 (m, 1H), 7.11-7.23 (m, 1H), 7.35-7.60 (m, 6H).

$^{13}\text{C}$  NMR (50 MHz,  $\text{CDCl}_3$ ) :  $\delta$  17.32, 25.47, 26.06, 27.43, 33.17, 83.60, 94.49, 109.36, 110.82, 123.06, 124.54, 126.88, 128.26, 128.52, 129.58, 130.06, 134.36, 143.30, 171.48, 205.83.

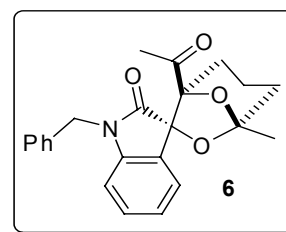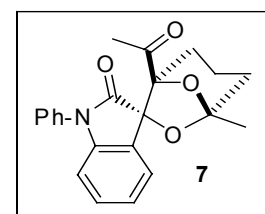

EIMS (m/z) : 363 (M<sup>+</sup>).

Analysis calcd for C<sub>22</sub>H<sub>21</sub>NO<sub>4</sub> : C, 72.71; H, 5.82; N, 3.85.

Found : C, 72.93; H, 5.80; N, 3.82.

**[1*S*,5*S*,7(3')*S*/1*R*,5*R*,7(3')*R*]-[1-Acetyl-5-methyl-6,8-dioxabicyclo(3.2.1)octane]-7-spiro-3'-(5'-nitroindolin-2'-one) (8):**

Yield : 48 %

m.p. : 214-216 °C

IR (KBr) :  $\nu$  3263, 1751, 1716, 1628 cm<sup>-1</sup>.

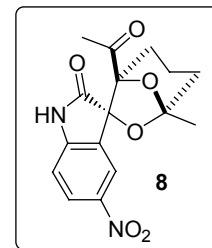

<sup>1</sup>H NMR (200 MHz, CDCl<sub>3</sub>) :  $\delta$  1.65-2.05 (m, 7H), 2.08-2.26 (m, 4H), 2.96-3.20 (m, 1H), 6.88 (d, 1H, *J* = 8.6 Hz), 8.20 (dd, 1H, *J* = 8.6 & 1.8 Hz), 8.26 (d, 1H, *J* = 1.8 Hz), 8.44 (b, 1H).

<sup>13</sup>C NMR (50 MHz, CDCl<sub>3</sub>) :  $\delta$  17.29, 25.53, 26.43, 27.26, 32.90, 83.04, 94.73, 110.07, 111.63, 120.17, 127.15, 130.63, 143.58, 146.18, 174.20, 206.98.

EIMS (m/z) : 332 (M<sup>+</sup>).

Analysis calcd for C<sub>16</sub>H<sub>16</sub>N<sub>2</sub>O<sub>6</sub> : C, 57.83; H, 4.85; N, 8.43.

Found : C, 57.98; H, 4.82; N, 8.38.

**[1*S*,5*S*,7(3')*S*/1*R*,5*R*,7(3')*R*]-[1-Acetyl-5-methyl-6,8-dioxabicyclo(3.2.1)octane]-7-spiro-3'-(1'-ethyl-5'-nitroindolin-2'-one) (9):**

Yield : 50 %

m.p. : 168-170 °C

IR (KBr) :  $\nu$  1738, 1711, 1608 cm<sup>-1</sup>.

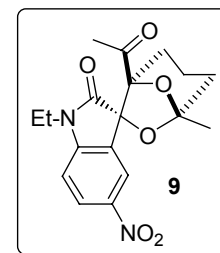

<sup>1</sup>H NMR (200 MHz, CDCl<sub>3</sub>) :  $\delta$  1.31 (t, 3H, *J* = 7.8 Hz), 1.62-2.21 (m, 11H), 2.95-3.28 (m, 1H), 3.65-4.00 (m, 2H), 6.84 (d, 1H, *J* = 7.8 Hz), 8.20-8.31 (m, 2H).

<sup>13</sup>C NMR (50 MHz, CDCl<sub>3</sub>) :  $\delta$  12.13, 17.25, 25.50, 26.15, 27.27, 33.00, 35.57, 82.67, 94.66, 107.85, 111.42, 119.86, 127.14, 130.39, 143.32, 148.02, 171.80, 206.12.

LCMS (m/z) : 383 (M+ Na)<sup>+</sup>.

Analysis calcd for C<sub>18</sub>H<sub>20</sub>N<sub>2</sub>O<sub>6</sub> : C, 59.99; H, 5.59; N, 7.77.

Found : C, 59.80; H, 5.60; N, 7.81.

**[1*S*,5*S*,7(3')*S*/1*R*,5*R*,7(3')*R*]-[1-Acetyl-5-methyl-6,8-dioxabicyclo(3.2.1)octane]-7-spiro-3'-(5'-bromo-1'-methylindolin-2'-one) (10):**

Yield : 61 %

m.p. : 179-180 °C

IR (KBr) :  $\nu$  1728, 1709, 1621 cm<sup>-1</sup>.

<sup>1</sup>H NMR (200 MHz, CDCl<sub>3</sub>) :  $\delta$  1.62-2.22 (m, 11H), 3.00-3.28 (m, 4H), 6.62 (d, 1H, *J* = 8.8 Hz), 7.40 (dd, 1H, *J* = 8.8 & 2.0 Hz), 7.50 (d, 1H, *J* = 2.0 Hz).

<sup>13</sup>C NMR (100 MHz, CDCl<sub>3</sub>) :  $\delta$  17.35, 25.55, 26.31, 26.64, 27.33, 33.04, 83.12, 94.20, 109.75, 110.89, 115.28, 127.23, 131.02, 132.95, 142.17, 171.43, 206.03.

LCMS (m/z) : 378 (M-H)<sup>-</sup>, 380 (M+2-H)<sup>-</sup>.

Analysis calcd for C<sub>17</sub>H<sub>18</sub>NO<sub>4</sub>Br : C, 53.70; H, 4.77; N, 3.68.

Found : C, 53.79; H, 4.72; N, 3.64.

**[1*S*,5*S*,7(3')*S*/1*R*,5*R*,7(3')*R*]-[1-Acetyl-5-methyl-6,8-dioxabicyclo(3.2.1)octane]-7-spiro-3'-(5'-bromo-1'-ethylindolin-2'-one) (11):**

Yield : 44 %

m.p. : 137-140 °C

IR (KBr) :  $\nu$  1724, 1707, 1624 cm<sup>-1</sup>.

<sup>1</sup>H NMR (200 MHz, CDCl<sub>3</sub>) :  $\delta$  1.25 (t, 3H, *J* = 6.8 Hz), 1.62-2.00 (m, 7H), 2.03-2.22 (m, 4H), 3.04-3.28 (m, 1H), 3.59-3.90 (m, 2H), 6.63 (d, 1H, *J* = 7.8 Hz), 7.38 (dd, 1H, *J* = 7.8 & 2.0 Hz), 7.52 (d, 1H, *J* = 2.0 Hz).

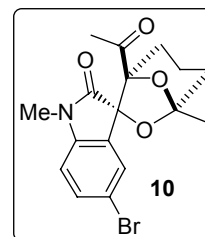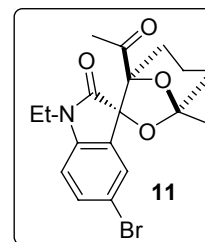

$^{13}\text{C}$  NMR (50 MHz,  $\text{CDCl}_3$ ) :  $\delta$  12.06, 17.30, 25.47, 26.08, 27.32, 33.06, 35.08, 83.11, 94.26, 109.72, 110.81, 114.98, 127.47, 131.28, 132.83, 141.28, 170.99, 205.65.

LCMS (m/z) : 394 (M+H) $^+$ , 396 (M+2+H) $^+$

Analysis calcd for  $\text{C}_{18}\text{H}_{20}\text{NO}_4\text{Br}$  : C, 54.83; H, 5.11; N, 3.55.

Found : C, 54.63; H, 5.13; N, 3.58.

**Crystal data** for **11**: empirical formula,  $\text{C}_{18}\text{H}_{20}\text{BrNO}_4$ ; formula weight, 394.26; crystal color, habit: colorless, rectangular; crystal dimensions, 0.51 X 0.45 X 0.30 mm; crystal system, monoclinic; lattice type, primitive; lattice parameters,  $a = 12.5767(8)$  Å,  $b = 9.3151(6)$  Å,  $c = 15.5341(11)$  Å;  $\alpha = 90.00$ ;  $\beta = 109.0860(10)$ ;  $\gamma = 90.00$ ;  $V = 1719.8(2)$  Å $^3$ ; space group, P 2 (1)/n (No:14);  $Z = 4$ ;  $D_{\text{calcd}} = 1.523$  g/cm $^3$ ;  $F_{000} = 808$ ;  $\lambda(\text{Mo-K}\alpha) = 0.71073$  Å;  $R(I \geq 2\sigma_1) = 0.0402$ ,  $wR^2 = 0.1123$ . Detailed X-ray crystallographic data is available from the Cambridge Crystallographic Data Centre, 12 Union Road, Cambridge CB2 1EZ, UK (for compound **11** CCDC # 248072).

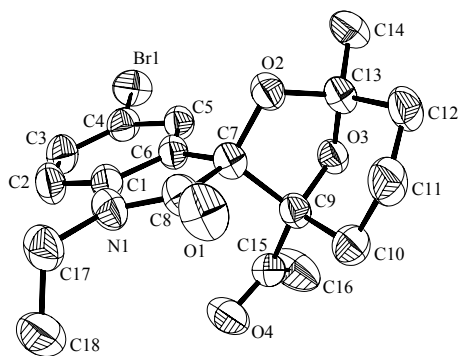

Fig.2. ORTEP diagram of compound **11**  
(Hydrogen atoms were omitted for clarity)

**[1S,5S,7(1')S/1R,5R,7(1')R]-[1-Acetyl-5-methyl-6,8-dioxabicyclo(3.2.1)octane]-7-spiro-1'-(1',2'-dihydroacenaphthalene-2'-one) (**13**):**

Yield : 72 %

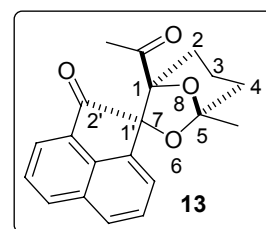



m.p. : 147-149 °C

IR (KBr) :  $\nu$  1724, 1712, 1622  $\text{cm}^{-1}$ .

$^1\text{H}$  NMR (400 MHz,  $\text{CDCl}_3$ ) :  $\delta$  1.71-2.10 (m, 10H), 2.13-2.27 (m, 1H), 3.19-3.38 (m, 1H), 7.59-7.66 (m, 1H), 7.71-7.83 (m, 2H), 7.87 (d, 1H,  $J = 8.8$  Hz), 8.00 (d, 1H,  $J = 6.8$  Hz), 8.09 (d, 1H,  $J = 7.6$ , Hz).

$^{13}\text{C}$  NMR (50 MHz,  $\text{CDCl}_3$ ) :  $\delta$  17.57, 25.48, 25.72, 28.10, 33.38, 87.23, 94.95, 110.52, 120.95, 121.80, 125.85, 128.33, 128.50, 130.36, 131.63, 132.91, 138.93, 141.01, 198.91, 205.88.

EIMS (m/z) : 322 ( $\text{M}^+$ ).

Analysis calcd for  $\text{C}_{20}\text{H}_{18}\text{O}_4$  : C, 74.52; H, 5.63.

Found : C, 74.70; H, 5.65.

**Crystal data** for **13**: empirical formula,  $\text{C}_{20}\text{H}_{18}\text{O}_4$ ; formula weight, 322.34; crystal color, habit: colorless, rectangular; crystal dimensions, 0.50 X 0.45 X 0.40 mm; crystal system, monoclinic; lattice type, primitive; lattice parameters,  $a = 11.901(2)$  Å,  $b = 9.0504(13)$  Å,  $c = 14.859(6)$  Å;  $\alpha = 90.00$ ;  $\beta = 90.66(2)$ ;  $\gamma = 90.00$ ;  $V = 1600.4(7)$  Å<sup>3</sup>; space group, P 21/c (No: 14);  $Z = 4$ ;  $D_{\text{calcd}} = 1.338$  g /  $\text{cm}^3$ ;  $F_{000} = 680$ ;  $\lambda(\text{Mo-K}\alpha) = 0.71073$  Å;  $R(I \geq 2\sigma_1) = 0.0712$ ,  $wR^2 = 0.1754$ . Detailed X-ray crystallographic data is available from the Cambridge Crystallographic Data Centre, 12 Union Road, Cambridge CB2 1EZ, UK (for compound **13** CCDC # 248073).

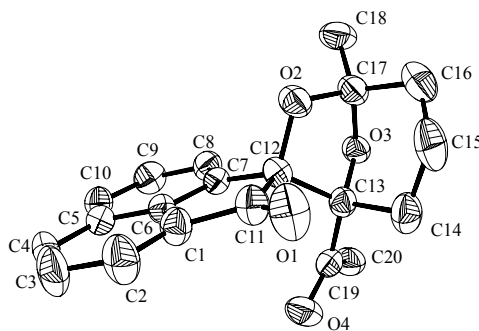

Fig.3. ORTEP diagram of compound **13**  
(Hydrogen atoms were omitted for clarity)

## Towards understanding the actual role of titanium tetrachloride

With a view to understand the nature of the actual species formed in the reaction of 2-acetyl-6-methyl-2,3-dihydro-4*H*-pyran (**2**) with TiCl<sub>4</sub>, we have recorded the <sup>1</sup>H NMR (400 MHz) and <sup>13</sup>C NMR (100 MHz) spectra of 2-acetyl-6-methyl-2,3-dihydro-4*H*-pyran (**2**) (1.0 eq.) in the presence of TiCl<sub>4</sub> (0.1 eq.) (the ratio of **2** and TiCl<sub>4</sub> is 1:0.1) in CDCl<sub>3</sub>. In the <sup>1</sup>H NMR spectrum, the multiplet originally at δ 4.24-4.32 appears now as two multiplets, one at δ 4.15-4.25 (major) and the other one at δ 4.28-4.34 (minor) due to methine proton.<sup>Δ</sup> There is also some change in splitting pattern in the region δ 1.60–2.40. Similarly, <sup>13</sup>C NMR spectrum, shows some additional peaks at δ 207.34 (C=O), 106.16 (C2), 78.70(C5), 39.39 and 33.54(alkyl).<sup>Δ</sup> These results clearly indicate the possible formation of titanium enolate or complexation as shown in eqn. 1.

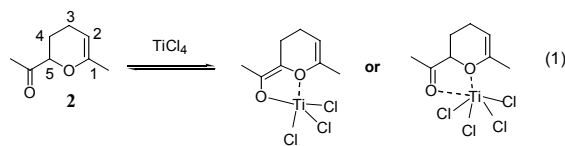

We have also recorded the <sup>1</sup>H NMR (400 MHz) and <sup>13</sup>C NMR (100 MHz) spectra of the 1-methylisatin (**1b**) (1.0 eq.) in the presence of TiCl<sub>4</sub> (0.2 eq.) (the ratio of **1b** and TiCl<sub>4</sub> is 1:0.2) in CDCl<sub>3</sub>. <sup>1</sup>H NMR spectrum, shows there is not significant change in the chemical shift values and the pattern of the peaks from the original spectrum. Similar trend was also observed in the <sup>13</sup>C NMR spectrum. These results do not give any clear indication for strong complexation between 1-methylisatin (**1b**) and titanium tetrachloride in the present reaction conditions. However, we cannot rule out some kind of complexation between 1-methylisatin (**1b**) and titanium tetrachloride (eqn. 2).

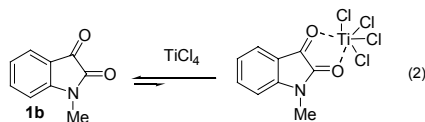

<sup>Δ</sup> We also noticed that small variations in quantity of TiCl<sub>4</sub> effect the intensity of additional peaks in the <sup>1</sup>H NMR and <sup>13</sup>C NMR spectra.
